# Supplementary material for: Integrins Have Cell-Type-Specific Roles in the Development of Motor Neuron Connectivity
Source: PubMed Central journal article supplement (PMC6787651; doi:10.3390/jdb7030017), 2019-08-27
Supplement: jdb-07-00017-s001.pdf [file jdb-07-00017-s001.pdf]

**Supplemental Table 1.** *C. elegans* strains used in this study

| Strain | Genotype                                        | Description                                                                                                                                                                                                      | Plasmid                                                                         |
|--------|-------------------------------------------------|------------------------------------------------------------------------------------------------------------------------------------------------------------------------------------------------------------------|---------------------------------------------------------------------------------|
| IZ2489 | <i>ufIs34; vsIs48</i>                           | GABA-specific (including DD + VD) transcriptional reporter (red); Cholinergic-specific transcriptional reporter (green)                                                                                          | <i>Punc-47::mCherry (pPRB5), lin-15+(pL15Ek); Punc-17::GFP, lin-15+(pL15Ek)</i> |
| IZ1481 | <i>ina-1(gm144)III;ufIs34;vsIs48</i>            | hypomorphic <i>ina-1</i> allele; GABA-specific (including DD + VD) transcriptional reporter (red), cholinergic-specific transcriptional reporter (green)                                                         | <i>Punc-47::mCherry (pPRB5), lin-15+(pL15Ek); Punc-17::GFP, lin-15+(pL15Ek)</i> |
| IZ1310 | <i>ufEx432</i>                                  | DVA specific transcriptional reporter                                                                                                                                                                            | <i>Pnlp-12::mCherry (pCL27)</i>                                                 |
| IZ1430 | <i>ina-1(gm144); ufEx432</i>                    | hypomorphic <i>ina-1</i> allele; DVA specific transcriptional reporter                                                                                                                                           | <i>Pnlp-12::mCherry (pCL27)</i>                                                 |
| IZ2288 | <i>oxIs12; ufIs128</i>                          | DD-specific transcriptional reporter (red); GABA-specific (including DD + VD) transcriptional reporter (green)                                                                                                   | <i>Punc-47::GFP; Pflp-13::mCherry (pAP31)</i>                                   |
| IZ3727 | <i>ina-1(gm144)III;oxIs12;ufIs128</i>           | <i>ina-1</i> hypomorphic allele; DD-specific transcriptional reporter (red); GABA-specific (including DD + VD) transcriptional reporter (green)                                                                  | <i>Punc-47::GFP; Pflp-13::mCherry (pAP31)</i>                                   |
| IZ3786 | <i>ina-1(gm144)III;oxIs12;ufIs128; ufEx1582</i> | GABA-specific (including DD + VD) transcriptional reporter (green); DD-specific transcriptional reporter (red); endogenous <i>ina-1</i> promoter driving <i>ina-1</i> + rescue in <i>ina-1(gm144)</i> background | <i>Punc-47::GFP; Pflp-13::mCherry (pAP31); Pina-1::ina-1cDNA (pDO91)</i>        |
| IZ3787 | <i>ina-1(gm144)III;oxIs12;ufIs128; ufEx1583</i> | GABA-specific (including DD + VD) transcriptional reporter (green); DD-specific transcriptional reporter (red); endogenous <i>ina-1</i> promoter driving <i>ina-1</i> + rescue in <i>ina-1(gm144)</i> background | <i>Punc-47::GFP; Pflp-13::mCherry (pAP31); Pina-1::ina-1cDNA (pDO91)</i>        |

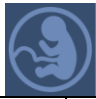

|        |                                                |                                                                                                                                                                                                      |                                                                            |
|--------|------------------------------------------------|------------------------------------------------------------------------------------------------------------------------------------------------------------------------------------------------------|----------------------------------------------------------------------------|
| IZ3790 | <i>ina-1(gm144)III;oxIs12;ufls128;ufEx1586</i> | GABA-specific (including DD + VD) transcriptional reporter (green); DD-specific transcriptional reporter (red); pan-neuronal promoter driving <i>ina-1+</i> rescue in <i>ina-1(gm144)</i> background | <i>Punc-47::GFP; Pflp-13::mCherry (pAP31); Prgef-1::ina-1cDNA (pDO81)</i>  |
| IZ3778 | <i>ina-1(gm144)III;oxIs12;ufls128;ufEx1577</i> | GABA-specific (including DD + VD) transcriptional reporter (green); DD-specific transcriptional reporter (red); pan-neuronal promoter driving <i>ina-1+</i> rescue in <i>ina-1(gm144)</i> background | <i>Punc-47::GFP; Pflp-13::mCherry (pAP31); Prgef-1::ina-1cDNA (pDO81)</i>  |
| IZ3833 | <i>ina-1(gm144)III;oxIs12;ufls128;ufEx1611</i> | GABA-specific (including DD + VD) transcriptional reporter (green); DD-specific transcriptional reporter (red); pan-neuronal promoter driving <i>ina-1+</i> rescue in <i>ina-1(gm144)</i> background | <i>Punc-47::GFP; Pflp-13::mCherry (pAP31); Prgef-1::ina-1cDNA (pDO81)</i>  |
| IZ3817 | <i>ina-1(gm144)III;oxIs12;ufls128;ufEx1604</i> | GABA-specific (including DD + VD) transcriptional reporter (green); DD-specific transcriptional reporter (red); GABAergic promoter driving <i>ina-1+</i> rescue in <i>ina-1(gm144)</i> background    | <i>Punc-47::GFP; Pflp-13::mCherry (pAP31); Punc-47::ina-1cDNA (pDO117)</i> |
| IZ3814 | <i>ina-1(gm144)III;oxIs12;ufls128;ufEx1601</i> | GABA-specific (including DD + VD) transcriptional reporter (green); DD-specific transcriptional reporter (red); GABAergic promoter driving <i>ina-1+</i> rescue in <i>ina-1(gm144)</i> background    | <i>Punc-47::GFP; Pflp-13::mCherry (pAP31); Punc-47::ina-1cDNA (pDO117)</i> |
| IZ3831 | <i>ina-1(gm144)III;oxIs12;ufls128;ufEx1610</i> | GABA-specific (including DD + VD) transcriptional reporter (green); DD-specific transcriptional reporter (red); GABAergic promoter driving <i>ina-1+</i> rescue in <i>ina-1(gm144)</i> background    | <i>Punc-47::GFP; Pflp-13::mCherry (pAP31); Punc-47::ina-1cDNA (pDO117)</i> |
| IZ3832 | <i>ina-1(gm144)III;oxIs12;ufls128;ufEx1611</i> | GABA-specific (including DD + VD) transcriptional reporter (green); DD-specific transcriptional reporter (red); GABAergic promoter driving <i>ina-1+</i> rescue in <i>ina-1(gm144)</i> background    | <i>Punc-47::GFP; Pflp-13::mCherry (pAP31); Punc-47::ina-1cDNA (pDO117)</i> |
| IZ3784 | <i>ina-1(gm144)III;oxIs12;ufls128;ufEx1580</i> | GABA-specific (including DD + VD) transcriptional reporter (green); DD-specific transcriptional reporter (red); cholinergic promoter driving <i>ina-1+</i> rescue in <i>ina-1(gm144)</i> background  | <i>Punc-47::GFP; Pflp-13::mCherry (pAP31); Punc-17β::ina-1cDNA (pDO75)</i> |

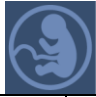

|        |                                                |                                                                                                                                                                                                      |                                                                                              |
|--------|------------------------------------------------|------------------------------------------------------------------------------------------------------------------------------------------------------------------------------------------------------|----------------------------------------------------------------------------------------------|
| IZ3782 | <i>ina-1(gm144)III;oxIs12;ufls128;ufEx1579</i> | GABA-specific (including DD + VD) transcriptional reporter (green); DD-specific transcriptional reporter (red); cholinergic promoter driving <i>ina-1</i> + rescue in <i>ina-1(gm144)</i> background | <i>Punc-47::GFP</i> ; <i>Pflp-13::mCherry</i> (pAP31); <i>Punc-17β::ina-1cDNA</i> (pDO75)    |
| IZ3791 | <i>ufEx1587;ufls34</i>                         | Transcriptional <i>ina-1</i> reporter (green); GABAergic transcriptional reporter (red)                                                                                                              | pDO119 ( <i>Pina-1::GFP</i> )<br><i>Punc-47::mCherry</i> (pPRB5), <i>lin-15+(pL15Ek)</i>     |
| IZ3770 | <i>ufEx1574;ufls43</i>                         | Transcriptional <i>ina-1</i> reporter (green); cholinergic transcriptional reporter (red)                                                                                                            | pDO119( <i>Pina-1::GFP</i> ); <i>Pacr-2::mCherry</i> (pPRB6)                                 |
| IZ1876 | <i>gmIs5;ufls34</i>                            | Translational INA-1 reporter (green); GABA-specific (including DD + VD) transcriptional reporter (red)                                                                                               | <i>Pina-1::GFP + rol-6(su1006)</i> ; <i>Punc-47::mCherry</i> (pPRB5), <i>lin-15+(pL15Ek)</i> |
| IZ3754 | <i>gmIs5;ufls43</i>                            | Translational INA-1 reporter (green); cholinergic-specific transcriptional reporter (red)                                                                                                            | <i>Pina-1::GFP + rol-6(su1006)</i> ; <i>Pacr-2::mCherry</i> (pPRB6)                          |

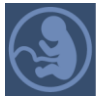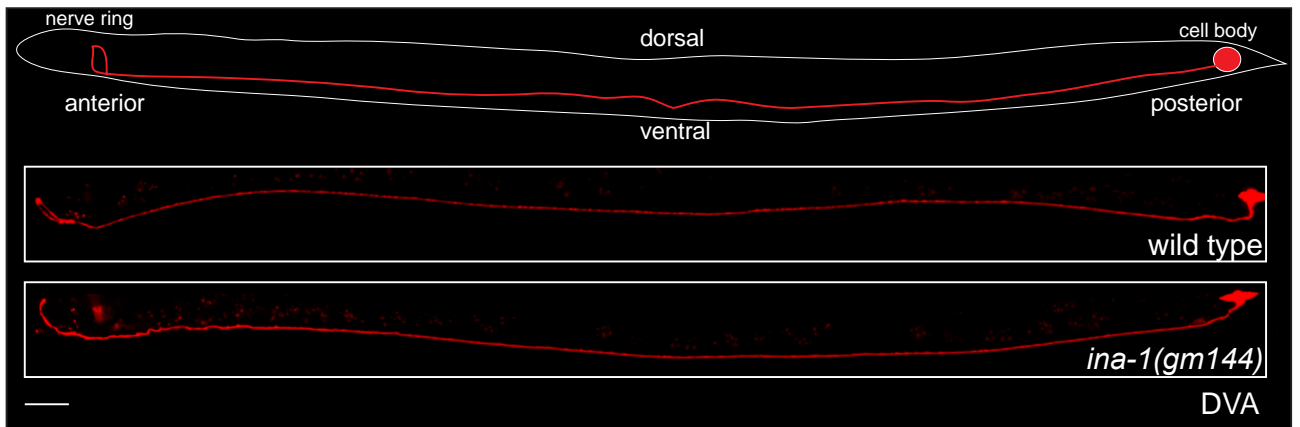

**Figure S1.** DVA develops independently of *ina-1*.

*Top*, Schematic of the DVA neuron. *Bottom panels*, Confocal images of DVA axon in wild type (n=28) and *ina-1(gm144)* animals (n=28). Scale bar, 20  $\mu$ m.

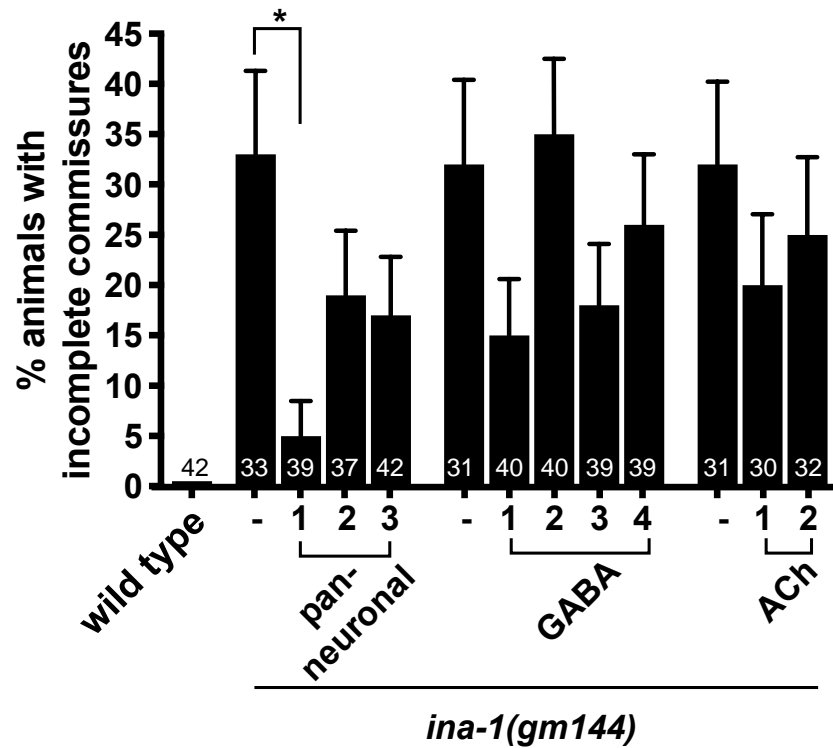

**Figure S2.** Quantification of incomplete commissures with cell-specific expression of wild type *ina-1* in *ina-1(gm144)* mutants. Promoters for pan-neuronal (*Prgef-1*), GABAergic (*Punc-47*), or cholinergic (*Punc-17β*) were used to drive expression of wild *ina-1* cDNA in *ina-1(gm144)* mutants. Data are plotted as the percentage of incomplete GABAergic commissures for each genotype. Error bars indicate standard error of the proportion. Pan-neuronal expression line #1 provided significant rescue. \* $p < 0.02$ , Fisher's exact test with Bonferroni correction for multiple comparisons.
